# Supplementary material for: Major differences in the dynamics of haematological and biochemical variables between trypanotolerant and susceptible cattle during Trypanosoma congolense infection
Source: Research Square preprint supplement (doi:10.21203/rs.3.rs-7511785/v1), 2025-10-22
Supplement: Supplementary file 1 [file 44caf31adb6faef716db2c04.xlsx]

## Sheet: Addfile6
Variable	Unit	Mean breed effet (se), p-value	Anova p-value	Usual values according to Bellier 2010a and 2010b
WEIGTH	kg	NDA: 106.80 (9.45) ZFU: 5.98 (12.61), p=0.64 CRB: 52.82 (12.95), p=0.0005	p=0.0007
TEMP	°C	NDA: 37.16 (0.14) ZFU: 0.26 (0.19), p=0.19 CRB: 0.79 (0.20), p=0.0007	P=0.002
PCV	%	NDA: 32.75 (1.37) ZFU: -0.20 (1.85), p=0.92 CRB: 0.73 (1.86), p=0.70	P=0.86	24-46
RBC	106/µl	NDA: 8.15 (0.47) ZFU: 0.37 (0.64), p=0.56 CRB: -0.75 (0.0.65), p=0.26	P=0.21	5.0-10.0
HB	g/dL	NDA: 8.75 (0.36) ZFU: 0.08 (0.48), p=0.87 CRB: 0.23 (0.50), p=0.65	P=0.90	8.0-15.0
LYM	103/µl	NDA: 8.27 (0.60) ZFU: -0.89 (0.85), p=0.30 CRB: -0.39 (0.84), p=0.65	P=0.58	2.5-7.5
GRA	103/µl	NDA: 3.37 (0.42) ZFU: -0.06 (0.56), p=0.92 CRB: 0.28 (0.59), p=0.63	P=0.81	0-6.7
MON*	103/µl	NDA: 0.1 (1.06) ZFU: 0 (0.28) CRB: 0 (0.14)	p=0.12	0.025-0.84
PLT	103/µl	NDA: 459.43 (54.78) ZFU: -99.90 (73.84) CRB: -102.65 (74.44)	P=0.32	110-800
MCV	fL	NDA: 41.08 (1.67) ZFU: -2.78 (2.23) p=0.23 CRB: 4.60 (2.90) p=0.06	P=0.009	40-60
MCH	pg	NDA: 10.99 (0.45) ZFU: -0.58 (0.60) p=0.35 CRB: 1.26 (0.61) p=0.05	P=0.01	11.0-17.0
MCHC	g/dL	NDA: 26.75 (0.24) ZFU: 0.42 (0.32) CRB: 0.08 (0.33)	P=0.38	30-36
MPV	fL	NDA: 5.39 (0.09) ZFU: 0.21 (0.12) CRB: 0.13 (0.13)	P=0.27	6.0-8.0
ALB	g/dL	NDA: 2.87 (0.70) ZFU: 0.30 (0.09) p=0.004 CRB: 0.25 (0.10) p=0.01	P=0.01	3-3.6
ALP	U/L	NDA: 138.38 (20.84) ZFU: 29.29 (27.45) p=0.30 CRB: -20.46 (27.83) p=0.47	P=0.17	0-589
ALT	U/L	NDA: 32.24 (3.42) ZFU: 1.61 (4.55) p=0.73 CRB: -8.28 (4.68) p=0.09	P=0.08	25-74
CHOL	mg/dL	NDA: 86.87 (9.19) ZFU: 53.70 (12.36) p=0.0003 CRB: 26.13 (12.64) p=0.05	P=0.001	80-196
CREA	mg/dL	NDA: 1.46 (0.07) ZFU: -0.37 (0.09) p=0.0007 CRB: -0.30 (0.10) p=0.006	P=0.002	0.9-2
GGT	U/L	NDA: 10.57 (2.43) ZFU: 0.17 (2.43) p=0.95 CRB: 1.05 (2.50) p=0.68	P=0.90	22-64
GLOB	g/dL	NDA: 5.13 (0.14) ZFU: -0.61 (0.19) p=0.003 CRB: -0.58 (0.19) p=0.006	P=0.006
GLU	mg/dL	NDA: 59.24 (2.40) ZFU: 16.65 (2.96) p=0 CRB: 23.43 (3.03) p=0	P=0.0001	45-75
LIPA	U/L	NDA: 31.38 (0.44) ZFU: 0.66 (0.59), p=0.28 CRB: -0.42 (0.61), p=0.49	P=0.18
TBIL	mg/dL	NDA: 0.83 (0.17) ZFU: 0.48 (0.24) p=0.05 CRB: -0.02 (0.24) p=0.94	P=0.07	0-0.5
Urea	mg/dL	NDA: 46.22 (4.35) ZFU: 28.31 (5.79) p=0.0001 CRB: 14.28 (5.95) p=0.03	P=0.0003	16-39
*MON: median (sd), Kruskal-Wallis p-value
Bellier, S. and Cordonnier, N. (2010a) ‘Les valeurs usuelles en hématologie vétérinaire’, Revue Francophone des Laboratoires, 2010(420), pp. 27–42. doi:10.1016/S1773-035X(10)70419-6.
Bellier, S. (2010b) ‘Interprétation et valeurs usuelles des paramètres sanguins en biochimie clinique vétérinaire’, Revue Francophone des Laboratoires, 2010(420), pp. 43-56. doi.org/10.1016/S1773-035X(10)70420-2
