# Supplementary material for: Major differences in the dynamics of haematological and biochemical variables between trypanotolerant and susceptible cattle during Trypanosoma congolense infection
Source: Research Square preprint supplement (doi:10.21203/rs.3.rs-7511785/v1), 2025-10-22
Supplement: Supplementary file 2 [file ae6707b1ba7714020fa11f34.xlsx]

## Sheet: Addfile5
ID	EUT	AFT	ZEB	Breed	Goup
CBT-CRB_1961	0.569224	0.143557	0.287219	CBT-CRB	New data
CBT-CRB_1962	0.50932	0.215034	0.275646	CBT-CRB	New data
CBT-CRB_1963	0.522427	0.193725	0.283848	CBT-CRB	New data
CBT-CRB_1964	0.592343	0.142375	0.265282	CBT-CRB	New data
CBT-CRB_1965	0.560156	0.150492	0.289352	CBT-CRB	New data
CBT-CRB_1966	0.677091	0.13417	0.188739	CBT-CRB	New data
CBT-CRB_1967	0.572746	0.124325	0.302929	CBT-CRB	New data
CBT-CRB_1968	0.621413	0.143908	0.23468	CBT-CRB	New data
CBT-NDA_1941	0.002209	0.96101	0.036781	CBT-NDA	New data
CBT-NDA_1942	1e-05	0.853129	0.146861	CBT-NDA	New data
CBT-NDA_1943	0.011581	0.951737	0.036682	CBT-NDA	New data
CBT-NDA_1944	1e-05	0.965485	0.034505	CBT-NDA	New data
CBT-NDA_1945	0.008142	0.838634	0.153224	CBT-NDA	New data
CBT-NDA_1946	0.009954	0.938842	0.051204	CBT-NDA	New data
CBT-NDA_1947	0.002671	0.971708	0.025621	CBT-NDA	New data
CBT-ZFU_1951	0.001911	0.337703	0.660387	CBT-ZFU	New data
CBT-ZFU_1952	1e-05	0.319129	0.680861	CBT-ZFU	New data
CBT-ZFU_1953	1e-05	0.325665	0.674325	CBT-ZFU	New data
CBT-ZFU_1954	1e-05	0.336436	0.663554	CBT-ZFU	New data
CBT-ZFU_1955	1e-05	0.344725	0.655265	CBT-ZFU	New data
CBT-ZFU_1956	1e-05	0.334958	0.665032	CBT-ZFU	New data
CBT-ZFU_1957	1e-05	0.323615	0.676375	CBT-ZFU	New data
CBT-ZFU_1958	1e-05	0.334784	0.665206	CBT-ZFU	New data
CBT-ZFU_1959	1e-05	0.346472	0.653518	CBT-ZFU	New data
ABO_1444	0.99998	1e-05	1e-05	ABO	EUT
ABO_1445	0.99998	1e-05	1e-05	ABO	EUT
ABO_1446	0.99998	1e-05	1e-05	ABO	EUT
ABO_1447	0.99998	1e-05	1e-05	ABO	EUT
ABO_1448	0.99998	1e-05	1e-05	ABO	EUT
ABO_1449	0.99998	1e-05	1e-05	ABO	EUT
ABO_1450	0.99998	1e-05	1e-05	ABO	EUT
ABO_1451	0.99998	1e-05	1e-05	ABO	EUT
ABO_1452	0.99998	1e-05	1e-05	ABO	EUT
ABO_1454	0.99998	1e-05	1e-05	ABO	EUT
ABO_1456	0.99998	1e-05	1e-05	ABO	EUT
ABO_1457	0.99998	1e-05	1e-05	ABO	EUT
ABO_1459	0.99998	1e-05	1e-05	ABO	EUT
ABO_1462	0.99998	1e-05	1e-05	ABO	EUT
ABO_1463	0.99998	1e-05	1e-05	ABO	EUT
ABO_1465	0.99998	1e-05	1e-05	ABO	EUT
ABO_1467	0.99998	1e-05	1e-05	ABO	EUT
ABO_1469	0.99998	1e-05	1e-05	ABO	EUT
ABO_1470	0.99998	1e-05	1e-05	ABO	EUT
ABO_1483	0.99998	1e-05	1e-05	ABO	EUT
ABO_1484	0.99998	1e-05	1e-05	ABO	EUT
ABO_1491	0.99998	1e-05	1e-05	ABO	EUT
ANG_000017	0.99998	1e-05	1e-05	ANG	EUT
ANG_000022	0.99998	1e-05	1e-05	ANG	EUT
ANG_001	0.99998	1e-05	1e-05	ANG	EUT
ANG_001400	0.99998	1e-05	1e-05	ANG	EUT
ANG_001778	0.99998	1e-05	1e-05	ANG	EUT
ANG_001781	0.99998	1e-05	1e-05	ANG	EUT
ANG_002	0.99998	1e-05	1e-05	ANG	EUT
ANG_003	0.99998	1e-05	1e-05	ANG	EUT
ANG_004	0.99998	1e-05	1e-05	ANG	EUT
ANG_005	0.99998	1e-05	1e-05	ANG	EUT
ANG_006	0.99998	1e-05	1e-05	ANG	EUT
ANG_007	0.99998	1e-05	1e-05	ANG	EUT
ANG_008	0.99998	1e-05	1e-05	ANG	EUT
ANG_009	0.99998	1e-05	1e-05	ANG	EUT
ANG_010	0.99998	1e-05	1e-05	ANG	EUT
ANG_011	0.99998	1e-05	1e-05	ANG	EUT
ANG_012	0.99998	1e-05	1e-05	ANG	EUT
ANG_013	0.99998	1e-05	1e-05	ANG	EUT
ANG_014	0.99998	1e-05	1e-05	ANG	EUT
ANG_015	0.99998	1e-05	1e-05	ANG	EUT
ANG_016	0.99998	1e-05	1e-05	ANG	EUT
ANG_017	0.99998	1e-05	1e-05	ANG	EUT
ANG_018	0.99998	1e-05	1e-05	ANG	EUT
ANG_019	0.99998	1e-05	1e-05	ANG	EUT
ANG_020	0.99998	1e-05	1e-05	ANG	EUT
ANG_021	0.99998	1e-05	1e-05	ANG	EUT
ANG_022	0.99998	1e-05	1e-05	ANG	EUT
ANG_023	0.99998	1e-05	1e-05	ANG	EUT
ANG_024	0.99998	1e-05	1e-05	ANG	EUT
ANG_026	0.99998	1e-05	1e-05	ANG	EUT
ANG_027	0.99998	1e-05	1e-05	ANG	EUT
ANG_028	0.99998	1e-05	1e-05	ANG	EUT
ANG_029	0.99998	1e-05	1e-05	ANG	EUT
ANG_031	0.99998	1e-05	1e-05	ANG	EUT
ANG_032	0.99998	1e-05	1e-05	ANG	EUT
ANG_033	0.99998	1e-05	1e-05	ANG	EUT
ANG_034	0.99998	1e-05	1e-05	ANG	EUT
ANG_035	0.99998	1e-05	1e-05	ANG	EUT
ANG_036	0.99998	1e-05	1e-05	ANG	EUT
ANG_038	0.99998	1e-05	1e-05	ANG	EUT
ANG_039	0.99998	1e-05	1e-05	ANG	EUT
ANG_041	0.99998	1e-05	1e-05	ANG	EUT
AUB_9062	0.99998	1e-05	1e-05	AUB	EUT
AUB_9063	0.99998	1e-05	1e-05	AUB	EUT
AUB_9064	0.99998	1e-05	1e-05	AUB	EUT
AUB_9066	0.99998	1e-05	1e-05	AUB	EUT
AUB_9067	0.99998	1e-05	1e-05	AUB	EUT
AUB_9068	0.99998	1e-05	1e-05	AUB	EUT
AUB_9069	0.99998	1e-05	1e-05	AUB	EUT
AUB_9070	0.99998	1e-05	1e-05	AUB	EUT
AUB_9072	0.99998	1e-05	1e-05	AUB	EUT
AUB_9073	0.99998	1e-05	1e-05	AUB	EUT
AUB_9074	0.99998	1e-05	1e-05	AUB	EUT
AUB_9075	0.99998	1e-05	1e-05	AUB	EUT
AUB_9076	0.99998	1e-05	1e-05	AUB	EUT
AUB_9079	0.99998	1e-05	1e-05	AUB	EUT
AUB_9081	0.99998	1e-05	1e-05	AUB	EUT
AUB_9208	0.99998	1e-05	1e-05	AUB	EUT
AUB_9211	0.99998	1e-05	1e-05	AUB	EUT
AUB_9212	0.99998	1e-05	1e-05	AUB	EUT
AUB_9213	0.99998	1e-05	1e-05	AUB	EUT
AUB_9215	0.99998	1e-05	1e-05	AUB	EUT
AUB_9230	0.99998	1e-05	1e-05	AUB	EUT
AUB_9235	0.99998	1e-05	1e-05	AUB	EUT
AYR_201199280	0.99998	1e-05	1e-05	AYR	EUT
AYR_201199400	0.99998	1e-05	1e-05	AYR	EUT
AYR_201199800	0.99998	1e-05	1e-05	AYR	EUT
AYR_201199920	0.99998	1e-05	1e-05	AYR	EUT
AYR_201200020	0.99998	1e-05	1e-05	AYR	EUT
AYR_201200040	0.99998	1e-05	1e-05	AYR	EUT
AYR_201200100	0.99998	1e-05	1e-05	AYR	EUT
AYR_201200280	0.99998	1e-05	1e-05	AYR	EUT
AYR_201207540	0.99998	1e-05	1e-05	AYR	EUT
AYR_201208000	0.99998	1e-05	1e-05	AYR	EUT
AYR_201331530	0.99998	1e-05	1e-05	AYR	EUT
AYR_201331550	0.99998	1e-05	1e-05	AYR	EUT
AYR_201331640	0.99998	1e-05	1e-05	AYR	EUT
AYR_201331650	0.99998	1e-05	1e-05	AYR	EUT
AYR_201331670	0.99998	1e-05	1e-05	AYR	EUT
AYR_201331680	0.99998	1e-05	1e-05	AYR	EUT
AYR_201331710	0.99998	1e-05	1e-05	AYR	EUT
AYR_201475510	0.99998	1e-05	1e-05	AYR	EUT
BAO_224	1e-05	0.99998	1e-05	BAO	AFT
BAO_225	1e-05	0.99998	1e-05	BAO	AFT
BAO_226	1e-05	0.99998	1e-05	BAO	AFT
BAO_228	1e-05	0.99998	1e-05	BAO	AFT
BAO_231	1e-05	0.99998	1e-05	BAO	AFT
BAO_232	1e-05	0.99998	1e-05	BAO	AFT
BAO_235	1e-05	0.99998	1e-05	BAO	AFT
BAO_236	1e-05	0.99998	1e-05	BAO	AFT
BAO_238	1e-05	0.99998	1e-05	BAO	AFT
BAO_240	1e-05	0.99998	1e-05	BAO	AFT
BAO_243	1e-05	0.99998	1e-05	BAO	AFT
BAO_245	1e-05	0.99998	1e-05	BAO	AFT
BAO_246	1e-05	0.99998	1e-05	BAO	AFT
BAO_249	1e-05	0.99998	1e-05	BAO	AFT
BAO_250	1e-05	0.99998	1e-05	BAO	AFT
BAO_260	1e-05	0.99998	1e-05	BAO	AFT
BAO_261	1e-05	0.99998	1e-05	BAO	AFT
BAO_262	1e-05	0.99998	1e-05	BAO	AFT
BAO_266	1e-05	0.99998	1e-05	BAO	AFT
BAO_267	1e-05	0.99998	1e-05	BAO	AFT
BAO_268	1e-05	0.99998	1e-05	BAO	AFT
BAO_272	1e-05	0.99998	1e-05	BAO	AFT
BAO_273	1e-05	0.99998	1e-05	BAO	AFT
BAO_274	1e-05	0.99998	1e-05	BAO	AFT
BAO_275	1e-05	0.99998	1e-05	BAO	AFT
BAO_276	1e-05	0.99998	1e-05	BAO	AFT
BAO_278	1e-05	0.99998	1e-05	BAO	AFT
BAO_288	1e-05	0.99998	1e-05	BAO	AFT
BOR_9504	1e-05	0.590813	0.409177	BOR	Admixed
BOR_9505	1e-05	0.590533	0.409457	BOR	Admixed
BOR_9506	1e-05	0.569299	0.430691	BOR	Admixed
BOR_9508	1e-05	0.697519	0.302471	BOR	Admixed
BOR_9509	1e-05	0.532127	0.467863	BOR	Admixed
BOR_9510	1e-05	0.547841	0.452149	BOR	Admixed
BOR_9511	1e-05	0.576802	0.423188	BOR	Admixed
BOR_9512	1e-05	0.465558	0.534432	BOR	Admixed
BOR_9513	1e-05	0.55457	0.44542	BOR	Admixed
BOR_9514	1e-05	0.636952	0.363038	BOR	Admixed
BOR_9515	1e-05	0.566813	0.433177	BOR	Admixed
BOR_9517	1e-05	0.522409	0.477581	BOR	Admixed
BOR_9518	1e-05	0.505356	0.494634	BOR	Admixed
BOR_9520	1e-05	0.550872	0.449118	BOR	Admixed
BOR_9522	1e-05	0.502596	0.497394	BOR	Admixed
BOR_9523	0.001848	0.479165	0.518987	BOR	Admixed
BOR_9524	1e-05	0.555201	0.444789	BOR	Admixed
BOR_9525	1e-05	0.554857	0.445133	BOR	Admixed
BOR_9526	1e-05	0.537414	0.462576	BOR	Admixed
BOR_9527	1e-05	0.554766	0.445224	BOR	Admixed
BOR_9528	1e-05	0.632055	0.367935	BOR	Admixed
BOR_9529	1e-05	0.696152	0.303838	BOR	Admixed
BOR_9530	1e-05	0.613243	0.386747	BOR	Admixed
BOR_9531	1e-05	0.622331	0.377659	BOR	Admixed
BRA_MN001	1e-05	1e-05	0.99998	BRA	ZEB
BRA_MN002	1e-05	1e-05	0.99998	BRA	ZEB
BRA_MN003	1e-05	1e-05	0.99998	BRA	ZEB
BRA_MN004	1e-05	1e-05	0.99998	BRA	ZEB
BRA_MN005	1e-05	1e-05	0.99998	BRA	ZEB
BRA_MN006	1e-05	1e-05	0.99998	BRA	ZEB
BRA_MN007	1e-05	1e-05	0.99998	BRA	ZEB
BRA_MN008	1e-05	1e-05	0.99998	BRA	ZEB
BRA_MN009	1e-05	1e-05	0.99998	BRA	ZEB
BRA_MN010	1e-05	1e-05	0.99998	BRA	ZEB
BRA_MN011	1e-05	1e-05	0.99998	BRA	ZEB
BRA_MN012	1e-05	1e-05	0.99998	BRA	ZEB
BRA_MN013	1e-05	1e-05	0.99998	BRA	ZEB
BRA_MN014	1e-05	1e-05	0.99998	BRA	ZEB
BRA_MN015	1e-05	1e-05	0.99998	BRA	ZEB
BRA_MN016	1e-05	1e-05	0.99998	BRA	ZEB
BRA_MN017	1e-05	1e-05	0.99998	BRA	ZEB
BRA_MN018	1e-05	1e-05	0.99998	BRA	ZEB
BRA_MN019	1e-05	1e-05	0.99998	BRA	ZEB
BRA_MN020	1e-05	1e-05	0.99998	BRA	ZEB
BRA_MN021	1e-05	1e-05	0.99998	BRA	ZEB
BRA_MN022	1e-05	1e-05	0.99998	BRA	ZEB
BRA_MN023	1e-05	1e-05	0.99998	BRA	ZEB
BRA_MN024	1e-05	1e-05	0.99998	BRA	ZEB
BRA_MN025	1e-05	1e-05	0.99998	BRA	ZEB
BRU_21723	0.99998	1e-05	1e-05	BRU	EUT
BRU_21724	0.99998	1e-05	1e-05	BRU	EUT
BRU_21725	0.99998	1e-05	1e-05	BRU	EUT
BRU_21726	0.99998	1e-05	1e-05	BRU	EUT
BRU_21727	0.99998	1e-05	1e-05	BRU	EUT
BRU_21728	0.99998	1e-05	1e-05	BRU	EUT
BRU_21729	0.99998	1e-05	1e-05	BRU	EUT
BRU_21730	0.99998	1e-05	1e-05	BRU	EUT
BRU_21731	0.99998	1e-05	1e-05	BRU	EUT
BRU_21732	0.99998	1e-05	1e-05	BRU	EUT
BRU_2317	0.99998	1e-05	1e-05	BRU	EUT
BRU_2328	0.99998	1e-05	1e-05	BRU	EUT
BRU_2329	0.99998	1e-05	1e-05	BRU	EUT
BRU_2342	0.99998	1e-05	1e-05	BRU	EUT
BRU_2432	0.99998	1e-05	1e-05	BRU	EUT
BRU_2433	0.99998	1e-05	1e-05	BRU	EUT
BRU_2434	0.99998	1e-05	1e-05	BRU	EUT
BRU_2435	0.99998	1e-05	1e-05	BRU	EUT
CHA_2138	0.99998	1e-05	1e-05	CHA	EUT
CHA_2139	0.99998	1e-05	1e-05	CHA	EUT
CHA_2140	0.99998	1e-05	1e-05	CHA	EUT
CHA_2141	0.99998	1e-05	1e-05	CHA	EUT
CHA_2142	0.99998	1e-05	1e-05	CHA	EUT
CHA_3106	0.99998	1e-05	1e-05	CHA	EUT
CHA_3111	0.99998	1e-05	1e-05	CHA	EUT
CHA_3113	0.99998	1e-05	1e-05	CHA	EUT
CHA_3114	0.99998	1e-05	1e-05	CHA	EUT
CHA_3116	0.99998	1e-05	1e-05	CHA	EUT
CHA_3117	0.99998	1e-05	1e-05	CHA	EUT
CHA_3118	0.99998	1e-05	1e-05	CHA	EUT
CHA_3119	0.99998	1e-05	1e-05	CHA	EUT
CHA_3121	0.99998	1e-05	1e-05	CHA	EUT
CHA_3122	0.99998	1e-05	1e-05	CHA	EUT
CHA_3123	0.99998	1e-05	1e-05	CHA	EUT
CHA_3125	0.99998	1e-05	1e-05	CHA	EUT
CHA_3128	0.99998	1e-05	1e-05	CHA	EUT
CHA_3129	0.99998	1e-05	1e-05	CHA	EUT
CHA_3130	0.99998	1e-05	1e-05	CHA	EUT
GAS_14180	0.99998	1e-05	1e-05	GAS	EUT
GAS_14183	0.99998	1e-05	1e-05	GAS	EUT
GAS_14185	0.99998	1e-05	1e-05	GAS	EUT
GAS_14186	0.99998	1e-05	1e-05	GAS	EUT
GAS_14187	0.99998	1e-05	1e-05	GAS	EUT
GAS_9048	0.99998	1e-05	1e-05	GAS	EUT
GAS_9049	0.99998	1e-05	1e-05	GAS	EUT
GAS_9050	0.99998	1e-05	1e-05	GAS	EUT
GAS_9051	0.99998	1e-05	1e-05	GAS	EUT
GAS_9054	0.99998	1e-05	1e-05	GAS	EUT
GAS_9055	0.99998	1e-05	1e-05	GAS	EUT
GAS_9057	0.99998	1e-05	1e-05	GAS	EUT
GAS_9058	0.99998	1e-05	1e-05	GAS	EUT
GAS_9059	0.99998	1e-05	1e-05	GAS	EUT
GAS_9060	0.99998	1e-05	1e-05	GAS	EUT
GAS_9173	0.99998	1e-05	1e-05	GAS	EUT
GAS_9174	0.99998	1e-05	1e-05	GAS	EUT
GAS_9175	0.99998	1e-05	1e-05	GAS	EUT
GAS_9176	0.99998	1e-05	1e-05	GAS	EUT
GAS_9177	0.99998	1e-05	1e-05	GAS	EUT
GAS_9200	0.99998	1e-05	1e-05	GAS	EUT
GAS_9203	0.99998	1e-05	1e-05	GAS	EUT
GBV_112275540	0.99998	1e-05	1e-05	GBV	EUT
GBV_112329320	0.99998	1e-05	1e-05	GBV	EUT
GBV_112335309	0.99998	1e-05	1e-05	GBV	EUT
GBV_112335319	0.99998	1e-05	1e-05	GBV	EUT
GBV_112335329	0.99998	1e-05	1e-05	GBV	EUT
GBV_112738359	0.99998	1e-05	1e-05	GBV	EUT
GBV_112738389	0.99998	1e-05	1e-05	GBV	EUT
GBV_112738399	0.99998	1e-05	1e-05	GBV	EUT
GBV_112738409	0.99998	1e-05	1e-05	GBV	EUT
GBV_112738429	0.99998	1e-05	1e-05	GBV	EUT
GBV_112738469	0.99998	1e-05	1e-05	GBV	EUT
GBV_112738499	0.99998	1e-05	1e-05	GBV	EUT
GBV_112738509	0.99998	1e-05	1e-05	GBV	EUT
GBV_112738579	0.99998	1e-05	1e-05	GBV	EUT
GBV_112738679	0.99998	1e-05	1e-05	GBV	EUT
GBV_112738769	0.99998	1e-05	1e-05	GBV	EUT
GBV_112738839	0.99998	1e-05	1e-05	GBV	EUT
GBV_112738939	0.99998	1e-05	1e-05	GBV	EUT
GBV_112738999	0.99998	1e-05	1e-05	GBV	EUT
GBV_112739019	0.99998	1e-05	1e-05	GBV	EUT
GIR_000001	1e-05	1e-05	0.99998	GIR	ZEB
GIR_000002	1e-05	1e-05	0.99998	GIR	ZEB
GIR_000003	1e-05	1e-05	0.99998	GIR	ZEB
GIR_000004	1e-05	1e-05	0.99998	GIR	ZEB
GIR_000005	1e-05	1e-05	0.99998	GIR	ZEB
GIR_000006	1e-05	1e-05	0.99998	GIR	ZEB
GIR_000007	1e-05	1e-05	0.99998	GIR	ZEB
GIR_000008	1e-05	1e-05	0.99998	GIR	ZEB
GIR_000009	1e-05	1e-05	0.99998	GIR	ZEB
GIR_000010	1e-05	1e-05	0.99998	GIR	ZEB
GIR_000011	1e-05	1e-05	0.99998	GIR	ZEB
GIR_000012	1e-05	1e-05	0.99998	GIR	ZEB
GIR_000013	1e-05	1e-05	0.99998	GIR	ZEB
GIR_000014	1e-05	1e-05	0.99998	GIR	ZEB
GIR_000015	1e-05	1e-05	0.99998	GIR	ZEB
GIR_000016	1e-05	1e-05	0.99998	GIR	ZEB
GIR_000017	1e-05	1e-05	0.99998	GIR	ZEB
GIR_000018	1e-05	1e-05	0.99998	GIR	ZEB
GIR_000019	1e-05	1e-05	0.99998	GIR	ZEB
GIR_000020	1e-05	1e-05	0.99998	GIR	ZEB
GIR_000021	1e-05	1e-05	0.99998	GIR	ZEB
GIR_000022	1e-05	1e-05	0.99998	GIR	ZEB
GIR_000023	1e-05	1e-05	0.99998	GIR	ZEB
GIR_000024	1e-05	1e-05	0.99998	GIR	ZEB
GNS_000001	0.99998	1e-05	1e-05	GNS	EUT
GNS_000002	0.99998	1e-05	1e-05	GNS	EUT
GNS_000003	0.99998	1e-05	1e-05	GNS	EUT
GNS_000004	0.99998	1e-05	1e-05	GNS	EUT
GNS_000005	0.99998	1e-05	1e-05	GNS	EUT
GNS_000006	0.99998	1e-05	1e-05	GNS	EUT
GNS_000007	0.99998	1e-05	1e-05	GNS	EUT
GNS_000008	0.99998	1e-05	1e-05	GNS	EUT
GNS_000009	0.99998	1e-05	1e-05	GNS	EUT
GNS_000010	0.99998	1e-05	1e-05	GNS	EUT
GNS_000011	0.99998	1e-05	1e-05	GNS	EUT
GNS_000012	0.99998	1e-05	1e-05	GNS	EUT
GNS_000013	0.99998	1e-05	1e-05	GNS	EUT
GNS_000014	0.99998	1e-05	1e-05	GNS	EUT
GNS_000015	0.99998	1e-05	1e-05	GNS	EUT
GNS_000016	0.99998	1e-05	1e-05	GNS	EUT
GNS_000017	0.99998	1e-05	1e-05	GNS	EUT
GNS_000018	0.99998	1e-05	1e-05	GNS	EUT
GNS_000019	0.99998	1e-05	1e-05	GNS	EUT
GNS_000020	0.99998	1e-05	1e-05	GNS	EUT
GNS_000021	0.99998	1e-05	1e-05	GNS	EUT
HOL_N1	0.99998	1e-05	1e-05	HOL	EUT
HOL_N10	0.99998	1e-05	1e-05	HOL	EUT
HOL_N11	0.99998	1e-05	1e-05	HOL	EUT
HOL_N12	0.99998	1e-05	1e-05	HOL	EUT
HOL_N13	0.99998	1e-05	1e-05	HOL	EUT
HOL_N14	0.99998	1e-05	1e-05	HOL	EUT
HOL_N15	0.99998	1e-05	1e-05	HOL	EUT
HOL_N16	0.99998	1e-05	1e-05	HOL	EUT
HOL_N17	0.99998	1e-05	1e-05	HOL	EUT
HOL_N18	0.99998	1e-05	1e-05	HOL	EUT
HOL_N19	0.99998	1e-05	1e-05	HOL	EUT
HOL_N2	0.99998	1e-05	1e-05	HOL	EUT
HOL_N20	0.99998	1e-05	1e-05	HOL	EUT
HOL_N21	0.99998	1e-05	1e-05	HOL	EUT
HOL_N22	0.99998	1e-05	1e-05	HOL	EUT
HOL_N23	0.99998	1e-05	1e-05	HOL	EUT
HOL_N24	0.99998	1e-05	1e-05	HOL	EUT
HOL_N25	0.99998	1e-05	1e-05	HOL	EUT
HOL_N26	0.99998	1e-05	1e-05	HOL	EUT
HOL_N27	0.99998	1e-05	1e-05	HOL	EUT
HOL_N28	0.99998	1e-05	1e-05	HOL	EUT
HOL_N29	0.99998	1e-05	1e-05	HOL	EUT
HOL_N3	0.99998	1e-05	1e-05	HOL	EUT
HOL_N30	0.99998	1e-05	1e-05	HOL	EUT
HOL_N4	0.99998	1e-05	1e-05	HOL	EUT
HOL_N5	0.99998	1e-05	1e-05	HOL	EUT
HOL_N6	0.99998	1e-05	1e-05	HOL	EUT
HOL_N7	0.99998	1e-05	1e-05	HOL	EUT
HOL_N8	0.99998	1e-05	1e-05	HOL	EUT
HOL_N9	0.99998	1e-05	1e-05	HOL	EUT
JER_3878	0.99998	1e-05	1e-05	JER	EUT
JER_5172	0.99998	1e-05	1e-05	JER	EUT
JER_5173	0.99998	1e-05	1e-05	JER	EUT
JER_5175	0.99998	1e-05	1e-05	JER	EUT
JER_5176	0.99998	1e-05	1e-05	JER	EUT
JER_5177	0.99998	1e-05	1e-05	JER	EUT
JER_5178	0.99998	1e-05	1e-05	JER	EUT
JER_5179	0.99998	1e-05	1e-05	JER	EUT
JER_5180	0.99998	1e-05	1e-05	JER	EUT
JER_5198	0.99998	1e-05	1e-05	JER	EUT
JER_5199	0.99998	1e-05	1e-05	JER	EUT
JER_5200	0.99998	1e-05	1e-05	JER	EUT
JER_5201	0.99998	1e-05	1e-05	JER	EUT
JER_5202	0.99998	1e-05	1e-05	JER	EUT
JER_5203	0.99998	1e-05	1e-05	JER	EUT
JER_5217	0.99998	1e-05	1e-05	JER	EUT
JER_5218	0.99998	1e-05	1e-05	JER	EUT
JER_5219	0.99998	1e-05	1e-05	JER	EUT
JER_5220	0.99998	1e-05	1e-05	JER	EUT
JER_5222	0.99998	1e-05	1e-05	JER	EUT
JER_5223	0.99998	1e-05	1e-05	JER	EUT
LAG_9402	1e-05	0.99998	1e-05	LAG	AFT
LAG_9403	1e-05	0.99998	1e-05	LAG	AFT
LAG_9404	1e-05	0.99998	1e-05	LAG	AFT
LAG_9405	1e-05	0.99998	1e-05	LAG	AFT
LAG_9406	1e-05	0.99998	1e-05	LAG	AFT
LAG_9407	1e-05	0.99998	1e-05	LAG	AFT
LAG_9408	1e-05	0.99998	1e-05	LAG	AFT
LAG_9409	1e-05	0.99998	1e-05	LAG	AFT
LAG_9410	1e-05	0.99998	1e-05	LAG	AFT
LAG_9411	1e-05	0.99998	1e-05	LAG	AFT
LAG_9413	1e-05	0.99998	1e-05	LAG	AFT
LAG_9414	1e-05	0.99998	1e-05	LAG	AFT
LAG_9415	1e-05	0.99998	1e-05	LAG	AFT
LAG_9416	1e-05	0.99998	1e-05	LAG	AFT
LAG_9417	1e-05	0.99998	1e-05	LAG	AFT
LAG_9418	1e-05	0.99998	1e-05	LAG	AFT
LAG_9419	1e-05	0.99998	1e-05	LAG	AFT
LAG_9420	1e-05	0.99998	1e-05	LAG	AFT
LAG_9421	1e-05	0.99998	1e-05	LAG	AFT
LAG_9422	1e-05	0.99998	1e-05	LAG	AFT
LAG_9423	1e-05	0.99998	1e-05	LAG	AFT
LAG_9424	1e-05	0.99998	1e-05	LAG	AFT
LAG_9425	1e-05	0.99998	1e-05	LAG	AFT
LAG_9426	1e-05	0.99998	1e-05	LAG	AFT
LAG_9427	1e-05	0.99998	1e-05	LAG	AFT
LAG_9428	1e-05	0.99998	1e-05	LAG	AFT
LAG_9429	1e-05	0.99998	1e-05	LAG	AFT
LAG_9430	1e-05	0.99998	1e-05	LAG	AFT
LAG_9432	1e-05	0.99998	1e-05	LAG	AFT
LAG_9433	1e-05	0.99998	1e-05	LAG	AFT
LAG_9434	1e-05	0.99998	1e-05	LAG	AFT
LAG_9435	1e-05	0.99998	1e-05	LAG	AFT
LAG_9436	1e-05	0.99998	1e-05	LAG	AFT
LAG_9437	1e-05	0.99998	1e-05	LAG	AFT
LAG_9438	1e-05	0.99998	1e-05	LAG	AFT
LAG_9439	1e-05	0.99998	1e-05	LAG	AFT
LAG_9440	1e-05	0.99998	1e-05	LAG	AFT
LAG_9441	1e-05	0.99998	1e-05	LAG	AFT
LAG_9443	1e-05	0.99998	1e-05	LAG	AFT
LAG_9444	1e-05	0.99998	1e-05	LAG	AFT
LAG_9445	1e-05	0.99998	1e-05	LAG	AFT
LAG_9446	1e-05	0.99998	1e-05	LAG	AFT
LAG_9447	1e-05	0.99998	1e-05	LAG	AFT
LAG_9448	1e-05	0.99998	1e-05	LAG	AFT
LIM_13882	0.99998	1e-05	1e-05	LIM	EUT
LIM_20772	0.99998	1e-05	1e-05	LIM	EUT
LIM_20807	0.99998	1e-05	1e-05	LIM	EUT
LIM_20809	0.99998	1e-05	1e-05	LIM	EUT
LIM_20815	0.99998	1e-05	1e-05	LIM	EUT
LIM_20840	0.99998	1e-05	1e-05	LIM	EUT
LIM_20842	0.99998	1e-05	1e-05	LIM	EUT
LIM_20850	0.99998	1e-05	1e-05	LIM	EUT
LIM_21203	0.99998	1e-05	1e-05	LIM	EUT
LIM_21204	0.99998	1e-05	1e-05	LIM	EUT
LIM_2997	0.99998	1e-05	1e-05	LIM	EUT
MAN_3160	0.99998	1e-05	1e-05	MAN	EUT
MAN_3161	0.99998	1e-05	1e-05	MAN	EUT
MAN_3164	0.99998	1e-05	1e-05	MAN	EUT
MAN_3165	0.99998	1e-05	1e-05	MAN	EUT
MAN_3167	0.99998	1e-05	1e-05	MAN	EUT
MAN_3168	0.99998	1e-05	1e-05	MAN	EUT
MAN_3170	0.99998	1e-05	1e-05	MAN	EUT
MAN_5193	0.99998	1e-05	1e-05	MAN	EUT
MAN_5359	0.99998	1e-05	1e-05	MAN	EUT
MAN_5360	0.99998	1e-05	1e-05	MAN	EUT
MAN_5361	0.99998	1e-05	1e-05	MAN	EUT
MAN_5363	0.99998	1e-05	1e-05	MAN	EUT
MAN_5364	0.99998	1e-05	1e-05	MAN	EUT
MAN_5365	0.99998	1e-05	1e-05	MAN	EUT
MAN_5366	0.99998	1e-05	1e-05	MAN	EUT
MAN_5367	0.99998	1e-05	1e-05	MAN	EUT
MAN_N1	0.99998	1e-05	1e-05	MAN	EUT
MAN_N10	0.99998	1e-05	1e-05	MAN	EUT
MAN_N11	0.99998	1e-05	1e-05	MAN	EUT
MAN_N12	0.99998	1e-05	1e-05	MAN	EUT
MAN_N13	0.99998	1e-05	1e-05	MAN	EUT
MAN_N14	0.99998	1e-05	1e-05	MAN	EUT
MAN_N15	0.99998	1e-05	1e-05	MAN	EUT
MAN_N16	0.99998	1e-05	1e-05	MAN	EUT
MAN_N17	0.99998	1e-05	1e-05	MAN	EUT
MAN_N18	0.99998	1e-05	1e-05	MAN	EUT
MAN_N19	0.99998	1e-05	1e-05	MAN	EUT
MAN_N2	0.99998	1e-05	1e-05	MAN	EUT
MAN_N20	0.99998	1e-05	1e-05	MAN	EUT
MAN_N21	0.99998	1e-05	1e-05	MAN	EUT
MAN_N22	0.99998	1e-05	1e-05	MAN	EUT
MAN_N23	0.99998	1e-05	1e-05	MAN	EUT
MAN_N24	0.99998	1e-05	1e-05	MAN	EUT
MAN_N25	0.99998	1e-05	1e-05	MAN	EUT
MAN_N26	0.99998	1e-05	1e-05	MAN	EUT
MAN_N27	0.99998	1e-05	1e-05	MAN	EUT
MAN_N28	0.99998	1e-05	1e-05	MAN	EUT
MAN_N29	0.99998	1e-05	1e-05	MAN	EUT
MAN_N3	0.99998	1e-05	1e-05	MAN	EUT
MAN_N30	0.99998	1e-05	1e-05	MAN	EUT
MAN_N4	0.99998	1e-05	1e-05	MAN	EUT
MAN_N5	0.99998	1e-05	1e-05	MAN	EUT
MAN_N6	0.99998	1e-05	1e-05	MAN	EUT
MAN_N7	0.99998	1e-05	1e-05	MAN	EUT
MAN_N8	0.99998	1e-05	1e-05	MAN	EUT
MAN_N9	0.99998	1e-05	1e-05	MAN	EUT
MAR_5235	0.99998	1e-05	1e-05	MAR	EUT
MAR_5251	0.99998	1e-05	1e-05	MAR	EUT
MAR_5265	0.99998	1e-05	1e-05	MAR	EUT
MAR_5266	0.99998	1e-05	1e-05	MAR	EUT
MAR_5267	0.99998	1e-05	1e-05	MAR	EUT
MAR_5268	0.99998	1e-05	1e-05	MAR	EUT
MAR_5269	0.99998	1e-05	1e-05	MAR	EUT
MAR_5275	0.99998	1e-05	1e-05	MAR	EUT
MAR_5278	0.99998	1e-05	1e-05	MAR	EUT
MAR_5286	0.99998	1e-05	1e-05	MAR	EUT
MAR_5290	0.99998	1e-05	1e-05	MAR	EUT
MAR_5293	0.99998	1e-05	1e-05	MAR	EUT
MAR_5303	0.99998	1e-05	1e-05	MAR	EUT
MAR_5306	0.99998	1e-05	1e-05	MAR	EUT
MAR_5311	0.99998	1e-05	1e-05	MAR	EUT
MAR_5320	0.99998	1e-05	1e-05	MAR	EUT
MAR_5321	0.99998	1e-05	1e-05	MAR	EUT
MAR_5322	0.99998	1e-05	1e-05	MAR	EUT
MAR_5326	0.99998	1e-05	1e-05	MAR	EUT
MON_N1	0.99998	1e-05	1e-05	MON	EUT
MON_N10	0.99998	1e-05	1e-05	MON	EUT
MON_N11	0.99998	1e-05	1e-05	MON	EUT
MON_N12	0.99998	1e-05	1e-05	MON	EUT
MON_N13	0.99998	1e-05	1e-05	MON	EUT
MON_N14	0.99998	1e-05	1e-05	MON	EUT
MON_N15	0.99998	1e-05	1e-05	MON	EUT
MON_N16	0.99998	1e-05	1e-05	MON	EUT
MON_N17	0.99998	1e-05	1e-05	MON	EUT
MON_N18	0.99998	1e-05	1e-05	MON	EUT
MON_N19	0.99998	1e-05	1e-05	MON	EUT
MON_N2	0.99998	1e-05	1e-05	MON	EUT
MON_N20	0.99998	1e-05	1e-05	MON	EUT
MON_N21	0.99998	1e-05	1e-05	MON	EUT
MON_N22	0.99998	1e-05	1e-05	MON	EUT
MON_N23	0.99998	1e-05	1e-05	MON	EUT
MON_N24	0.99998	1e-05	1e-05	MON	EUT
MON_N25	0.99998	1e-05	1e-05	MON	EUT
MON_N26	0.99998	1e-05	1e-05	MON	EUT
MON_N27	0.99998	1e-05	1e-05	MON	EUT
MON_N28	0.99998	1e-05	1e-05	MON	EUT
MON_N29	0.99998	1e-05	1e-05	MON	EUT
MON_N3	0.99998	1e-05	1e-05	MON	EUT
MON_N30	0.99998	1e-05	1e-05	MON	EUT
MON_N4	0.99998	1e-05	1e-05	MON	EUT
MON_N5	0.99998	1e-05	1e-05	MON	EUT
MON_N6	0.99998	1e-05	1e-05	MON	EUT
MON_N7	0.99998	1e-05	1e-05	MON	EUT
MON_N8	0.99998	1e-05	1e-05	MON	EUT
MON_N9	0.99998	1e-05	1e-05	MON	EUT
ND1_202	1e-05	0.954353	0.045637	ND1	AFT
ND1_205	1e-05	0.974683	0.025307	ND1	AFT
ND1_211	1e-05	0.960732	0.039258	ND1	AFT
ND1_233	0.003373	0.894394	0.102232	ND1	AFT
ND1_241	1e-05	0.916366	0.083624	ND1	AFT
ND1_242	1e-05	0.910804	0.089186	ND1	AFT
ND1_244	1e-05	0.89981	0.10018	ND1	AFT
ND1_248	1e-05	0.912828	0.087162	ND1	AFT
ND1_253	1e-05	0.925298	0.074692	ND1	AFT
ND1_255	1e-05	0.917943	0.082047	ND1	AFT
ND1_257	0.003052	0.890914	0.106034	ND1	AFT
ND1_258	1e-05	0.911246	0.088744	ND1	AFT
ND1_284	1e-05	0.935975	0.064015	ND1	AFT
ND1_292	1e-05	0.91288	0.08711	ND1	AFT
ND2_206	1e-05	0.901845	0.098145	ND2	AFT
ND2_207	1e-05	0.802987	0.197003	ND2	AFT
ND2_208	1e-05	0.844238	0.155752	ND2	AFT
ND2_209	1e-05	0.868822	0.131168	ND2	AFT
ND2_210	1e-05	0.870279	0.129711	ND2	AFT
ND2_212	1e-05	0.924512	0.075478	ND2	AFT
ND2_213	1e-05	0.908844	0.091146	ND2	AFT
ND2_214	1e-05	0.869072	0.130918	ND2	AFT
ND2_215	1e-05	0.863706	0.136284	ND2	AFT
ND2_216	1e-05	0.882935	0.117055	ND2	AFT
ND2_217	1e-05	0.879762	0.120228	ND2	AFT
ND2_218	1e-05	0.901352	0.098638	ND2	AFT
ND2_219	1e-05	0.92455	0.07544	ND2	AFT
ND2_220	1e-05	0.935304	0.064686	ND2	AFT
ND2_221	1e-05	0.950178	0.049812	ND2	AFT
ND2_222	1e-05	0.893732	0.106258	ND2	AFT
ND2_223	1e-05	0.944359	0.055631	ND2	AFT
ND4_WG0099890-DNAA11_NDA000012	1e-05	0.99998	1e-05	ND4	AFT
ND4_WG0099890-DNAB11_NDA000013	1e-05	0.99998	1e-05	ND4	AFT
ND4_WG0099890-DNAB12_NDA000024	1e-05	0.99998	1e-05	ND4	AFT
ND4_WG0099890-DNAC11_NDA000014	1e-05	0.99998	1e-05	ND4	AFT
ND4_WG0099890-DNAC12_NDA000025	1e-05	0.99998	1e-05	ND4	AFT
ND4_WG0099890-DNAD10_NDA000001	1e-05	0.99998	1e-05	ND4	AFT
ND4_WG0099890-DNAD11_NDA000015	1e-05	0.99998	1e-05	ND4	AFT
ND4_WG0099890-DNAD12_NDA000027	1e-05	0.99998	1e-05	ND4	AFT
ND4_WG0099890-DNAE10_NDA000005	1e-05	0.99998	1e-05	ND4	AFT
ND4_WG0099890-DNAE11_NDA000017	1e-05	0.99998	1e-05	ND4	AFT
ND4_WG0099890-DNAE12_NDA000029	1e-05	0.99998	1e-05	ND4	AFT
ND4_WG0099890-DNAF10_NDA000006	1e-05	0.99998	1e-05	ND4	AFT
ND4_WG0099890-DNAF11_NDA000019	1e-05	0.99998	1e-05	ND4	AFT
ND4_WG0099890-DNAF12_NDA000030	1e-05	0.99998	1e-05	ND4	AFT
ND4_WG0099890-DNAG10_NDA000010	1e-05	0.99998	1e-05	ND4	AFT
ND4_WG0099890-DNAG11_NDA000021	1e-05	0.99998	1e-05	ND4	AFT
ND4_WG0099890-DNAG12_NDA000033	1e-05	0.99998	1e-05	ND4	AFT
ND4_WG0099890-DNAH10_NDA000011	1e-05	0.99998	1e-05	ND4	AFT
ND4_WG0099890-DNAH11_NDA000022	1e-05	0.99998	1e-05	ND4	AFT
ND4_WG0099890-DNAH12_NDA000035	1e-05	0.99998	1e-05	ND4	AFT
ND4_WG0099891-DNAB01_NDA000036	1e-05	0.99998	1e-05	ND4	AFT
ND4_WG0099891-DNAC01_NDA000041	1e-05	0.99998	1e-05	ND4	AFT
ND4_WG0099891-DNAD01_NDA000043	1e-05	0.99998	1e-05	ND4	AFT
ND4_WG0099891-DNAE01_NDA000044	1e-05	0.99998	1e-05	ND4	AFT
NEL_000001	1e-05	1e-05	0.99998	NEL	ZEB
NEL_000003	1e-05	1e-05	0.99998	NEL	ZEB
NEL_000004	1e-05	1e-05	0.99998	NEL	ZEB
NEL_000005	1e-05	1e-05	0.99998	NEL	ZEB
NEL_000006	1e-05	1e-05	0.99998	NEL	ZEB
NEL_000007	1e-05	1e-05	0.99998	NEL	ZEB
NEL_000008	1e-05	1e-05	0.99998	NEL	ZEB
NEL_000009	1e-05	1e-05	0.99998	NEL	ZEB
NEL_000010	1e-05	1e-05	0.99998	NEL	ZEB
NEL_000011	1e-05	1e-05	0.99998	NEL	ZEB
NEL_000012	1e-05	1e-05	0.99998	NEL	ZEB
NEL_000013	1e-05	1e-05	0.99998	NEL	ZEB
NEL_000014	1e-05	1e-05	0.99998	NEL	ZEB
NEL_000015	1e-05	1e-05	0.99998	NEL	ZEB
NEL_000016	1e-05	1e-05	0.99998	NEL	ZEB
NEL_000017	1e-05	1e-05	0.99998	NEL	ZEB
NEL_000020	1e-05	1e-05	0.99998	NEL	ZEB
NEL_000021	1e-05	1e-05	0.99998	NEL	ZEB
NEL_000022	1e-05	1e-05	0.99998	NEL	ZEB
NEL_000023	1e-05	1e-05	0.99998	NEL	ZEB
NEL_000024	1e-05	1e-05	0.99998	NEL	ZEB
NOR_N1	0.99998	1e-05	1e-05	NOR	EUT
NOR_N10	0.99998	1e-05	1e-05	NOR	EUT
NOR_N11	0.99998	1e-05	1e-05	NOR	EUT
NOR_N12	0.99998	1e-05	1e-05	NOR	EUT
NOR_N13	0.99998	1e-05	1e-05	NOR	EUT
NOR_N14	0.99998	1e-05	1e-05	NOR	EUT
NOR_N15	0.99998	1e-05	1e-05	NOR	EUT
NOR_N16	0.99998	1e-05	1e-05	NOR	EUT
NOR_N17	0.99998	1e-05	1e-05	NOR	EUT
NOR_N18	0.99998	1e-05	1e-05	NOR	EUT
NOR_N19	0.99998	1e-05	1e-05	NOR	EUT
NOR_N2	0.99998	1e-05	1e-05	NOR	EUT
NOR_N20	0.99998	1e-05	1e-05	NOR	EUT
NOR_N21	0.99998	1e-05	1e-05	NOR	EUT
NOR_N22	0.99998	1e-05	1e-05	NOR	EUT
NOR_N23	0.99998	1e-05	1e-05	NOR	EUT
NOR_N24	0.99998	1e-05	1e-05	NOR	EUT
NOR_N25	0.99998	1e-05	1e-05	NOR	EUT
NOR_N26	0.99998	1e-05	1e-05	NOR	EUT
NOR_N27	0.99998	1e-05	1e-05	NOR	EUT
NOR_N28	0.99998	1e-05	1e-05	NOR	EUT
NOR_N29	0.99998	1e-05	1e-05	NOR	EUT
NOR_N3	0.99998	1e-05	1e-05	NOR	EUT
NOR_N30	0.99998	1e-05	1e-05	NOR	EUT
NOR_N4	0.99998	1e-05	1e-05	NOR	EUT
NOR_N5	0.99998	1e-05	1e-05	NOR	EUT
NOR_N6	0.99998	1e-05	1e-05	NOR	EUT
NOR_N7	0.99998	1e-05	1e-05	NOR	EUT
NOR_N8	0.99998	1e-05	1e-05	NOR	EUT
NOR_N9	0.99998	1e-05	1e-05	NOR	EUT
NRC_000001	0.99998	1e-05	1e-05	NRC	EUT
NRC_000002	0.99998	1e-05	1e-05	NRC	EUT
NRC_000003	0.99998	1e-05	1e-05	NRC	EUT
NRC_000004	0.99998	1e-05	1e-05	NRC	EUT
NRC_000005	0.99998	1e-05	1e-05	NRC	EUT
NRC_000006	0.99998	1e-05	1e-05	NRC	EUT
NRC_000007	0.99998	1e-05	1e-05	NRC	EUT
NRC_000009	0.99998	1e-05	1e-05	NRC	EUT
NRC_000010	0.99998	1e-05	1e-05	NRC	EUT
NRC_000011	0.99998	1e-05	1e-05	NRC	EUT
NRC_000012	0.99998	1e-05	1e-05	NRC	EUT
NRC_000013	0.99998	1e-05	1e-05	NRC	EUT
NRC_000014	0.99998	1e-05	1e-05	NRC	EUT
NRC_000015	0.99998	1e-05	1e-05	NRC	EUT
NRC_000016	0.99998	1e-05	1e-05	NRC	EUT
NRC_000017	0.99998	1e-05	1e-05	NRC	EUT
NRC_000019	0.99998	1e-05	1e-05	NRC	EUT
NRC_000020	0.99998	1e-05	1e-05	NRC	EUT
NRC_000021	0.99998	1e-05	1e-05	NRC	EUT
NRC_000023	0.99998	1e-05	1e-05	NRC	EUT
NRC_000025	0.99998	1e-05	1e-05	NRC	EUT
ONG_614520210	1e-05	1e-05	0.99998	ONG	ZEB
ONG_614520220	1e-05	1e-05	0.99998	ONG	ZEB
ONG_614520240	1e-05	1e-05	0.99998	ONG	ZEB
ONG_614520280	1e-05	1e-05	0.99998	ONG	ZEB
ONG_614520290	1e-05	1e-05	0.99998	ONG	ZEB
ONG_614520300	1e-05	1e-05	0.99998	ONG	ZEB
ONG_614520310	1e-05	1e-05	0.99998	ONG	ZEB
ONG_614520320	1e-05	1e-05	0.99998	ONG	ZEB
ONG_614520330	1e-05	1e-05	0.99998	ONG	ZEB
ONG_614520340	1e-05	1e-05	0.99998	ONG	ZEB
ONG_614520350	1e-05	1e-05	0.99998	ONG	ZEB
ONG_614520370	1e-05	1e-05	0.99998	ONG	ZEB
ONG_614520380	1e-05	1e-05	0.99998	ONG	ZEB
ONG_614520390	1e-05	1e-05	0.99998	ONG	ZEB
ONG_614520560	1e-05	1e-05	0.99998	ONG	ZEB
ONG_614520570	1e-05	1e-05	0.99998	ONG	ZEB
ONG_614520580	1e-05	1e-05	0.99998	ONG	ZEB
ONG_614520590	1e-05	1e-05	0.99998	ONG	ZEB
ONG_614520600	1e-05	1e-05	0.99998	ONG	ZEB
ONG_614520610	1e-05	1e-05	0.99998	ONG	ZEB
PMT_000001	0.99998	1e-05	1e-05	PMT	EUT
PMT_000002	0.99998	1e-05	1e-05	PMT	EUT
PMT_000003	0.99998	1e-05	1e-05	PMT	EUT
PMT_000004	0.99998	1e-05	1e-05	PMT	EUT
PMT_000005	0.99998	1e-05	1e-05	PMT	EUT
PMT_000006	0.99998	1e-05	1e-05	PMT	EUT
PMT_000007	0.99998	1e-05	1e-05	PMT	EUT
PMT_000008	0.99998	1e-05	1e-05	PMT	EUT
PMT_000009	0.99998	1e-05	1e-05	PMT	EUT
PMT_000010	0.99998	1e-05	1e-05	PMT	EUT
PMT_000011	0.99998	1e-05	1e-05	PMT	EUT
PMT_000012	0.99998	1e-05	1e-05	PMT	EUT
PMT_000013	0.99998	1e-05	1e-05	PMT	EUT
PMT_000014	0.99998	1e-05	1e-05	PMT	EUT
PMT_000015	0.99998	1e-05	1e-05	PMT	EUT
PMT_000016	0.99998	1e-05	1e-05	PMT	EUT
PMT_000017	0.99998	1e-05	1e-05	PMT	EUT
PMT_000018	0.99998	1e-05	1e-05	PMT	EUT
PMT_000019	0.99998	1e-05	1e-05	PMT	EUT
PMT_000020	0.99998	1e-05	1e-05	PMT	EUT
PMT_000021	0.99998	1e-05	1e-05	PMT	EUT
PMT_000022	0.99998	1e-05	1e-05	PMT	EUT
PMT_000023	0.99998	1e-05	1e-05	PMT	EUT
PMT_000024	0.99998	1e-05	1e-05	PMT	EUT
RAN_129334049	0.99998	1e-05	1e-05	RAN	EUT
RAN_129334069	0.99998	1e-05	1e-05	RAN	EUT
RAN_129334089	0.99998	1e-05	1e-05	RAN	EUT
RAN_129334099	0.99998	1e-05	1e-05	RAN	EUT
RAN_129334139	0.99998	1e-05	1e-05	RAN	EUT
RAN_129341460	0.99998	1e-05	1e-05	RAN	EUT
RAN_129341490	0.99998	1e-05	1e-05	RAN	EUT
RAN_129341500	0.99998	1e-05	1e-05	RAN	EUT
RAN_129341780	0.99998	1e-05	1e-05	RAN	EUT
RAN_129733290	0.99998	1e-05	1e-05	RAN	EUT
RAN_129733330	0.99998	1e-05	1e-05	RAN	EUT
RAN_129733340	0.99998	1e-05	1e-05	RAN	EUT
RAN_129733360	0.99998	1e-05	1e-05	RAN	EUT
RAN_129733410	0.99998	1e-05	1e-05	RAN	EUT
RAN_129733420	0.99998	1e-05	1e-05	RAN	EUT
RAN_129733450	0.99998	1e-05	1e-05	RAN	EUT
RAN_129733500	0.99998	1e-05	1e-05	RAN	EUT
RAN_129733540	0.99998	1e-05	1e-05	RAN	EUT
RAN_129733570	0.99998	1e-05	1e-05	RAN	EUT
RMG_000001	0.99998	1e-05	1e-05	RMG	EUT
RMG_000002	0.99998	1e-05	1e-05	RMG	EUT
RMG_000003	0.99998	1e-05	1e-05	RMG	EUT
RMG_000004	0.99998	1e-05	1e-05	RMG	EUT
RMG_000005	0.99998	1e-05	1e-05	RMG	EUT
RMG_000006	0.99998	1e-05	1e-05	RMG	EUT
RMG_000007	0.99998	1e-05	1e-05	RMG	EUT
RMG_000008	0.99998	1e-05	1e-05	RMG	EUT
RMG_000009	0.99998	1e-05	1e-05	RMG	EUT
RMG_000010	0.99998	1e-05	1e-05	RMG	EUT
RMG_000011	0.99998	1e-05	1e-05	RMG	EUT
RMG_000012	0.99998	1e-05	1e-05	RMG	EUT
RMG_000013	0.99998	1e-05	1e-05	RMG	EUT
RMG_000014	0.99998	1e-05	1e-05	RMG	EUT
RMG_000015	0.99998	1e-05	1e-05	RMG	EUT
RMG_000016	0.99998	1e-05	1e-05	RMG	EUT
RMG_000017	0.99998	1e-05	1e-05	RMG	EUT
RMG_000018	0.99998	1e-05	1e-05	RMG	EUT
RMG_000019	0.99998	1e-05	1e-05	RMG	EUT
RMG_000020	0.99998	1e-05	1e-05	RMG	EUT
RMG_000021	0.99998	1e-05	1e-05	RMG	EUT
RMG_000022	0.99998	1e-05	1e-05	RMG	EUT
RMG_000023	0.99998	1e-05	1e-05	RMG	EUT
RMG_000024	0.99998	1e-05	1e-05	RMG	EUT
SAH_506333289	1e-05	1e-05	0.99998	SAH	ZEB
SAH_506333299	1e-05	1e-05	0.99998	SAH	ZEB
SAH_506333309	1e-05	1e-05	0.99998	SAH	ZEB
SAH_506333319	1e-05	1e-05	0.99998	SAH	ZEB
SAH_506333329	1e-05	1e-05	0.99998	SAH	ZEB
SAH_506333339	1e-05	1e-05	0.99998	SAH	ZEB
SAH_506333349	1e-05	1e-05	0.99998	SAH	ZEB
SAH_506333359	1e-05	1e-05	0.99998	SAH	ZEB
SAH_506333369	1e-05	1e-05	0.99998	SAH	ZEB
SAH_506333379	1e-05	1e-05	0.99998	SAH	ZEB
SAH_506333389	1e-05	1e-05	0.99998	SAH	ZEB
SAH_506333399	1e-05	1e-05	0.99998	SAH	ZEB
SAH_506752699	1e-05	1e-05	0.99998	SAH	ZEB
SAH_506752709	1e-05	1e-05	0.99998	SAH	ZEB
SAH_506752719	1e-05	1e-05	0.99998	SAH	ZEB
SAH_506752749	1e-05	1e-05	0.99998	SAH	ZEB
SAH_506752759	1e-05	1e-05	0.99998	SAH	ZEB
SAL_9087	0.99998	1e-05	1e-05	SAL	EUT
SAL_9088	0.99998	1e-05	1e-05	SAL	EUT
SAL_9089	0.99998	1e-05	1e-05	SAL	EUT
SAL_9091	0.99998	1e-05	1e-05	SAL	EUT
SAL_9093	0.99998	1e-05	1e-05	SAL	EUT
SAL_9094	0.99998	1e-05	1e-05	SAL	EUT
SAL_9095	0.99998	1e-05	1e-05	SAL	EUT
SAL_9096	0.99998	1e-05	1e-05	SAL	EUT
SAL_9097	0.99998	1e-05	1e-05	SAL	EUT
SAL_9099	0.99998	1e-05	1e-05	SAL	EUT
SAL_9100	0.99998	1e-05	1e-05	SAL	EUT
SAL_9101	0.99998	1e-05	1e-05	SAL	EUT
SAL_9102	0.99998	1e-05	1e-05	SAL	EUT
SAL_9103	0.99998	1e-05	1e-05	SAL	EUT
SAL_9241	0.99998	1e-05	1e-05	SAL	EUT
SAL_9245	0.99998	1e-05	1e-05	SAL	EUT
SAL_9249	0.99998	1e-05	1e-05	SAL	EUT
SAL_9251	0.99998	1e-05	1e-05	SAL	EUT
SAL_9253	0.99998	1e-05	1e-05	SAL	EUT
SAL_9255	0.99998	1e-05	1e-05	SAL	EUT
SAL_9260	0.99998	1e-05	1e-05	SAL	EUT
SAL_9261	0.99998	1e-05	1e-05	SAL	EUT
SGT_000001	0.655248	1e-05	0.344742	SGT	Admixed
SGT_000002	0.653577	1e-05	0.346413	SGT	Admixed
SGT_000003	0.679904	1e-05	0.320086	SGT	Admixed
SGT_000004	0.744505	1e-05	0.255485	SGT	Admixed
SGT_000005	0.661108	1e-05	0.338882	SGT	Admixed
SGT_000006	0.656497	1e-05	0.343493	SGT	Admixed
SGT_000008	0.673299	1e-05	0.326691	SGT	Admixed
SGT_000009	0.723354	1e-05	0.276636	SGT	Admixed
SGT_000010	0.670394	1e-05	0.329596	SGT	Admixed
SGT_000012	0.718662	1e-05	0.281328	SGT	Admixed
SGT_000013	0.681948	1e-05	0.318042	SGT	Admixed
SGT_000014	0.664318	1e-05	0.335672	SGT	Admixed
SGT_000015	0.635957	1e-05	0.364033	SGT	Admixed
SGT_000016	0.663459	1e-05	0.336531	SGT	Admixed
SGT_000017	0.689538	1e-05	0.310452	SGT	Admixed
SGT_000018	0.700592	1e-05	0.299398	SGT	Admixed
SGT_000019	0.652197	1e-05	0.347793	SGT	Admixed
SGT_000020	0.630758	1e-05	0.369232	SGT	Admixed
SGT_000021	0.697462	1e-05	0.302528	SGT	Admixed
SGT_000022	0.609639	1e-05	0.390351	SGT	Admixed
SGT_000023	0.680499	1e-05	0.319491	SGT	Admixed
SGT_000024	0.701753	1e-05	0.298237	SGT	Admixed
SGT_000025	0.756197	1e-05	0.243793	SGT	Admixed
SGT_000026	0.690076	1e-05	0.309914	SGT	Admixed
SHO_124274220	0.99998	1e-05	1e-05	SHO	EUT
SHO_124274230	0.99998	1e-05	1e-05	SHO	EUT
SHO_124274240	0.99998	1e-05	1e-05	SHO	EUT
SHO_124274500	0.99998	1e-05	1e-05	SHO	EUT
SHO_124274510	0.99998	1e-05	1e-05	SHO	EUT
SHO_124274520	0.99998	1e-05	1e-05	SHO	EUT
SHO_124274530	0.99998	1e-05	1e-05	SHO	EUT
SHO_124274540	0.99998	1e-05	1e-05	SHO	EUT
SHO_124274550	0.99998	1e-05	1e-05	SHO	EUT
SHO_124274560	0.99998	1e-05	1e-05	SHO	EUT
SHO_124274710	0.99998	1e-05	1e-05	SHO	EUT
SHO_124274720	0.99998	1e-05	1e-05	SHO	EUT
SHO_124274920	0.99998	1e-05	1e-05	SHO	EUT
SHO_124330530	0.99998	1e-05	1e-05	SHO	EUT
SHO_124330540	0.99998	1e-05	1e-05	SHO	EUT
SHO_124330640	0.99998	1e-05	1e-05	SHO	EUT
SHO_124330650	0.99998	1e-05	1e-05	SHO	EUT
SHO_124330670	0.99998	1e-05	1e-05	SHO	EUT
SHO_124330700	0.99998	1e-05	1e-05	SHO	EUT
SHO_124330720	0.99998	1e-05	1e-05	SHO	EUT
SHO_124330740	0.99998	1e-05	1e-05	SHO	EUT
SHO_124330760	0.99998	1e-05	1e-05	SHO	EUT
SHO_124330770	0.99998	1e-05	1e-05	SHO	EUT
SHO_124330780	0.99998	1e-05	1e-05	SHO	EUT
SHO_124330810	0.99998	1e-05	1e-05	SHO	EUT
SHO_124330830	0.99998	1e-05	1e-05	SHO	EUT
SHO_124330840	0.99998	1e-05	1e-05	SHO	EUT
SHO_124330850	0.99998	1e-05	1e-05	SHO	EUT
SHO_124330860	0.99998	1e-05	1e-05	SHO	EUT
SHO_124330880	0.99998	1e-05	1e-05	SHO	EUT
SHO_124330900	0.99998	1e-05	1e-05	SHO	EUT
SHO_124330940	0.99998	1e-05	1e-05	SHO	EUT
SHO_124330960	0.99998	1e-05	1e-05	SHO	EUT
SHO_124330980	0.99998	1e-05	1e-05	SHO	EUT
SHO_124330990	0.99998	1e-05	1e-05	SHO	EUT
SOM_9352	1e-05	0.99998	1e-05	SOM	AFT
SOM_9353	1e-05	0.99998	1e-05	SOM	AFT
SOM_9354	1e-05	0.99998	1e-05	SOM	AFT
SOM_9355	1e-05	0.99998	1e-05	SOM	AFT
SOM_9356	1e-05	0.99998	1e-05	SOM	AFT
SOM_9357	1e-05	0.99998	1e-05	SOM	AFT
SOM_9358	1e-05	0.99998	1e-05	SOM	AFT
SOM_9360	1e-05	0.99998	1e-05	SOM	AFT
SOM_9361	1e-05	0.99998	1e-05	SOM	AFT
SOM_9362	1e-05	0.99998	1e-05	SOM	AFT
SOM_9363	1e-05	0.99998	1e-05	SOM	AFT
SOM_9364	1e-05	0.99998	1e-05	SOM	AFT
SOM_9365	1e-05	0.99998	1e-05	SOM	AFT
SOM_9366	1e-05	0.99998	1e-05	SOM	AFT
SOM_9367	1e-05	0.99998	1e-05	SOM	AFT
SOM_9368	1e-05	0.99998	1e-05	SOM	AFT
SOM_9371	1e-05	0.99998	1e-05	SOM	AFT
SOM_9372	1e-05	0.99998	1e-05	SOM	AFT
SOM_9374	1e-05	0.99998	1e-05	SOM	AFT
SOM_9375	1e-05	0.99998	1e-05	SOM	AFT
SOM_9376	1e-05	0.99998	1e-05	SOM	AFT
SOM_9377	1e-05	0.99998	1e-05	SOM	AFT
SOM_9378	1e-05	0.99998	1e-05	SOM	AFT
SOM_9379	1e-05	0.99998	1e-05	SOM	AFT
SOM_9380	1e-05	0.99998	1e-05	SOM	AFT
SOM_9381	1e-05	0.99998	1e-05	SOM	AFT
SOM_9382	1e-05	0.99998	1e-05	SOM	AFT
SOM_9383	1e-05	0.99998	1e-05	SOM	AFT
SOM_9384	1e-05	0.99998	1e-05	SOM	AFT
SOM_9386	1e-05	0.99998	1e-05	SOM	AFT
SOM_9387	1e-05	0.99998	1e-05	SOM	AFT
SOM_9388	1e-05	0.99998	1e-05	SOM	AFT
SOM_9389	1e-05	0.99998	1e-05	SOM	AFT
SOM_9390	1e-05	0.99998	1e-05	SOM	AFT
SOM_9391	1e-05	0.99998	1e-05	SOM	AFT
SOM_9392	1e-05	0.99998	1e-05	SOM	AFT
SOM_9393	1e-05	0.99998	1e-05	SOM	AFT
SOM_9394	1e-05	0.99998	1e-05	SOM	AFT
SOM_9396	1e-05	0.99998	1e-05	SOM	AFT
SOM_9397	1e-05	0.99998	1e-05	SOM	AFT
SOM_9398	1e-05	0.99998	1e-05	SOM	AFT
SOM_9399	1e-05	0.99998	1e-05	SOM	AFT
SOM_9400	1e-05	0.99998	1e-05	SOM	AFT
SOM_9401	1e-05	0.99998	1e-05	SOM	AFT
TAR_1416	0.99998	1e-05	1e-05	TAR	EUT
TAR_1417	0.99998	1e-05	1e-05	TAR	EUT
TAR_1418	0.99998	1e-05	1e-05	TAR	EUT
TAR_1419	0.99998	1e-05	1e-05	TAR	EUT
TAR_1422	0.99998	1e-05	1e-05	TAR	EUT
TAR_1423	0.99998	1e-05	1e-05	TAR	EUT
TAR_1425	0.99998	1e-05	1e-05	TAR	EUT
TAR_1426	0.99998	1e-05	1e-05	TAR	EUT
TAR_1427	0.99998	1e-05	1e-05	TAR	EUT
TAR_1428	0.99998	1e-05	1e-05	TAR	EUT
TAR_1429	0.99998	1e-05	1e-05	TAR	EUT
TAR_1430	0.99998	1e-05	1e-05	TAR	EUT
TAR_1431	0.99998	1e-05	1e-05	TAR	EUT
TAR_1432	0.99998	1e-05	1e-05	TAR	EUT
TAR_1433	0.99998	1e-05	1e-05	TAR	EUT
TAR_1434	0.99998	1e-05	1e-05	TAR	EUT
TAR_1438	0.99998	1e-05	1e-05	TAR	EUT
TAR_1439	0.99998	1e-05	1e-05	TAR	EUT
VOS_21714	0.99998	1e-05	1e-05	VOS	EUT
VOS_21719	0.99998	1e-05	1e-05	VOS	EUT
VOS_21720	0.99998	1e-05	1e-05	VOS	EUT
VOS_3537	0.99998	1e-05	1e-05	VOS	EUT
VOS_3539	0.99998	1e-05	1e-05	VOS	EUT
VOS_3540	0.99998	1e-05	1e-05	VOS	EUT
VOS_3542	0.99998	1e-05	1e-05	VOS	EUT
VOS_3544	0.99998	1e-05	1e-05	VOS	EUT
VOS_3546	0.99998	1e-05	1e-05	VOS	EUT
VOS_3547	0.99998	1e-05	1e-05	VOS	EUT
VOS_3549	0.99998	1e-05	1e-05	VOS	EUT
VOS_3551	0.99998	1e-05	1e-05	VOS	EUT
VOS_3559	0.99998	1e-05	1e-05	VOS	EUT
VOS_3563	0.99998	1e-05	1e-05	VOS	EUT
VOS_3638	0.99998	1e-05	1e-05	VOS	EUT
VOS_3640	0.99998	1e-05	1e-05	VOS	EUT
VOS_3641	0.99998	1e-05	1e-05	VOS	EUT
VOS_3642	0.99998	1e-05	1e-05	VOS	EUT
VOS_3643	0.99998	1e-05	1e-05	VOS	EUT
VOS_3645	0.99998	1e-05	1e-05	VOS	EUT
ZFU_9453	1e-05	0.309615	0.690375	ZFU	AFZ
ZFU_9454	1e-05	0.316762	0.683228	ZFU	AFZ
ZFU_9455	1e-05	0.331624	0.668366	ZFU	AFZ
ZFU_9456	1e-05	0.316781	0.683209	ZFU	AFZ
ZFU_9457	1e-05	0.342198	0.657792	ZFU	AFZ
ZFU_9458	1e-05	0.393278	0.606712	ZFU	AFZ
ZFU_9459	1e-05	0.326258	0.673732	ZFU	AFZ
ZFU_9460	1e-05	0.303734	0.696256	ZFU	AFZ
ZFU_9461	1e-05	0.376333	0.623657	ZFU	AFZ
ZFU_9462	1e-05	0.336436	0.663554	ZFU	AFZ
ZFU_9466	1e-05	0.357646	0.642344	ZFU	AFZ
ZFU_9469	1e-05	0.353108	0.646882	ZFU	AFZ
ZFU_9470	1e-05	0.338848	0.661142	ZFU	AFZ
ZFU_9471	1e-05	0.33593	0.66406	ZFU	AFZ
ZFU_9472	1e-05	0.317199	0.682791	ZFU	AFZ
ZFU_9474	1e-05	0.330269	0.669721	ZFU	AFZ
ZFU_9475	1e-05	0.357467	0.642523	ZFU	AFZ
ZFU_9476	1e-05	0.382567	0.617423	ZFU	AFZ
ZFU_9477	1e-05	0.341636	0.658354	ZFU	AFZ
ZFU_9478	1e-05	0.367817	0.632173	ZFU	AFZ
ZFU_9479	1e-05	0.327614	0.672376	ZFU	AFZ
ZFU_9481	1e-05	0.350645	0.649345	ZFU	AFZ
ZFU_9482	1e-05	0.350573	0.649417	ZFU	AFZ
ZFU_9484	1e-05	0.354844	0.645146	ZFU	AFZ

## Sheet: readme
ID	animal identifier
EUT	percentage of European taurine ancestry based on admixture analysis, with supervised clustering
AFT	percentage of African taurine ancestry based on admixture analysis, with supervised clustering
ZEB	percentage of indicine ancestry based on admixture analysis, with supervised clustering
Breed	Breed of origin
Goup	Group of origin. New data: original data from this publication; EUT: European taurine; AFT: African taurine; ZEB: Indian zebu; AFZ: African zebu; Admixed: admixed breed
Breed code	Breed name
ABO	Abondance
ANG	Angus
AUB	Aubrac
AYR	Ayrshire
BAO	Baoulé
BOR	Borgou
BRA	Brahman
BRU	French brown Swiss
CBT-CRB	this publication: cross-bred cattle
CBT-NDA	this publication: N'Dama
CBT-ZFU	this publication: Zebu fulani
CHA	Charolais
GAS	Gascon
GBV	Gelbvieh
GIR	Gir
GNS	Guernsey
HOL	Holstein
JER	Jersey
LAG	Lagune
LIM	Limousine
MAN	Maine-Anjou (Rouge des Près)
MAR	Maraichine
MON	Montbéliarde
ND1	N'Dama
ND2	N'Dama
ND4	N'Dama
NEL	Nelore
NOR	Normande
NRC	Norwegian red cattle
ONG	Ongole
PMT	Piemontaise
RAN	Red Angus
RMG	Romagnola
SAH	Sahiwal
SAL	Salers
SGT	Santa Gertrudis
SHO	Shorthorn
SOM	Somda
TAR	Tarine
VOS	Vosgienne
ZFU	Zebu Fulani
